# Supplementary material for: WIDDE: a Web-Interfaced next generation database for genetic diversity exploration, with a first application in cattle
Source: PubMed Central journal article supplement (PMC4647285; doi:10.1186/s12864-015-2181-1), 2015-11-14
Supplement: 12864_2015_2181_MOESM1_ESM.pdf [file 12864_2015_2181_MOESM1_ESM.pdf]

**Example of a Variant document (BSON format), containing information about the marker itself**

```
{
  "_id" : "BTA000628179", _____ Variant ID, unique per variant type and position on the genome
  "_class" : "VD", _____ Required by Spring-Data, used for Object/Document Mapping
  "v" : NumberLong(3), _____ Variant records are versioned to achieve optimistic locking during imports
  "ty" : "SNP", _____ Variant type code
  "sy" : { _____ Block containing synonyms for this variant, grouped by category
    "il" : ["ARS-BFGL-NGS-116023", "BFGL-NGS-116023"], _____ List of Illumina synonyms for this variant
    "in" : ["F0407890"], _____ List of synonyms stored for internal use
    "nc" : ["rs109318750"] _____ List of NCBI RefSNP (rs) synonyms
  },
  "ka" : ["G", "A"] _____ List of known alleles for this variant
}
```

**Example of a VariantRunData document (BSON format), embedding variant genotypes for all samples involved in a run**

```
{
  "_id" : { _____ VariantRunData ID (composite)
    "pi" : NumberInt(10), _____ Project ID
    "rn" : "run1", _____ Run name
    "vi" : "BTA000628179" _____ Variant ID
  },
  "_class" : "R", _____ Required by Spring-Data, used for Object/Document Mapping
  "sp" : { _____ List of samples involved in this run
    "1" : { _____ Block containing data related to the genotyping of sample 1 in this run
      "gt" : "1/1" _____ Genotype found for sample 2 in this run: A/A
    },
    "2" : { _____ Block containing data related to the genotyping of sample 2 in this run
      "gt" : "0/0" _____ Genotype found for sample 2 in this run: G/G
    },
    "3" : { _____ Block containing data related to the genotyping of sample 3 in this run
      "gt" : "0/1" _____ Genotype found for sample 2 in this run: G/A
    }
  }
}
```
