# Supplementary material for: WIDDE: a Web-Interfaced next generation database for genetic diversity exploration, with a first application in cattle
Source: PubMed Central journal article supplement (PMC4647285; doi:10.1186/s12864-015-2181-1), 2015-11-14
Supplement: 12864_2015_2181_MOESM2_ESM.pdf [file 12864_2015_2181_MOESM2_ESM.pdf]

» Reset «

Use double-click (or scroll-wheel) to zoom-in, shift + double-click (or scroll-wheel) to zoom-out.

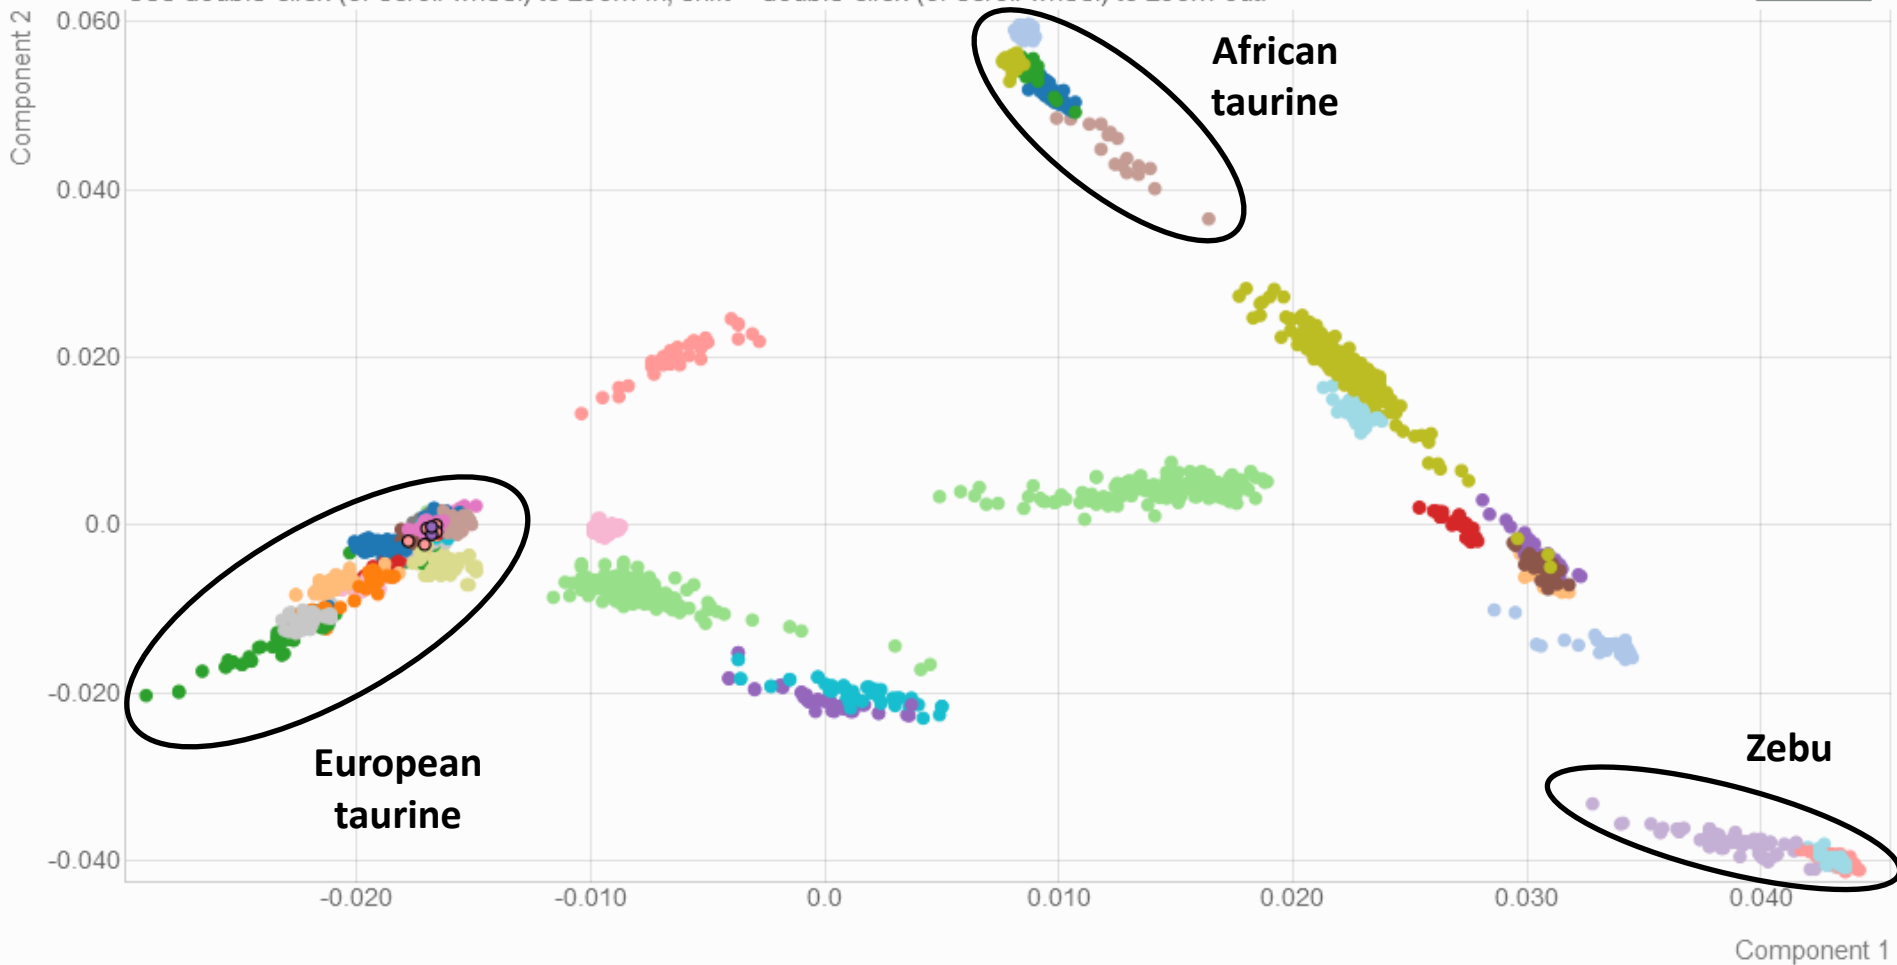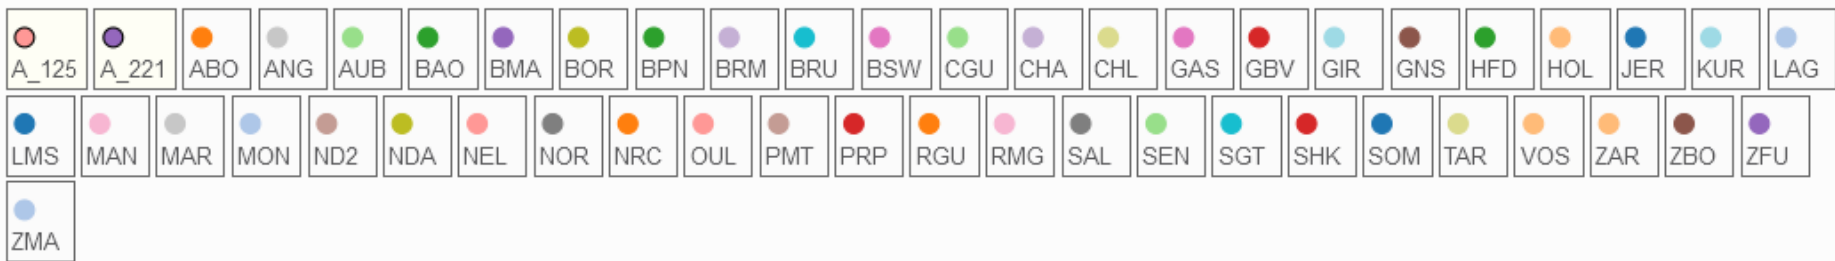

Displayed components: X-axis Component 1 (8.43%) Y-axis Component 2 (3.80%)

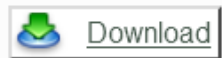

Download
